# Supplementary material for: IRX1 Promotes Loss of Subcutaneous Adipose Tissue by Inhibiting Adipocyte Differentiation in Cachectic Patients with Gastric Cancer
Source: Research Square preprint supplement (doi:10.21203/rs.3.rs-1344846/v1), 2022-02-16
Supplement: Supplementary file 1 [file d05b9efde4a0eddb414ce9d1.docx]

**Table S1. Patients’ characteristics for RNA sequencing**

| Parameters | Cachexia (n = 3) |
| --- | --- |
| Ages (years) | 61.5±7.4 |
| Sex (n) | Male (3) |
| BMI (kg/m2) | 21.9±2.1 |
| Proportion of weight loss in recent 6 months (%) | 9.5±1.6 |
| Lymphocyte count (10^9/L) | 1.4±0.1 |
| Albumin (g/L) | 35.6±3.9 |
| IL-6 (pg/ml ) | 9.8±1.3 |
| TNF-α (pg/ml) | 11.2±1.8 |
| TNM stage III+IV(n) | 3 |
| VAT area (cm2) | 75.5±15.2 |
| SAT area (cm2) | 69.2±12.4 |

BMI, body mass index; IL-6, interleukin-6; TNF-α, tumor necrosis factor-α; SAT: subcutaneous adipose tissue; VAT: visceral adipose tissue

**Table S2. Primer Sequences used for qRT-PCR.**

| Name |  | Mouse |
| --- | --- | --- |
| ATGL | Forward | CAACGCCACTCACATCTACG |
|  | Reverse | AGCAGGCAGGGTCTTCAGT |
| HSL | Forward | CCTCAAAGTCAAACCCTCCA |
|  | Reverse | GTGCGTAAATCCATGCTGT |
| UCP1 | Forward | CACCTTCCCGCTGGACACT |
|  | Reverse | CCCTAGGACACCTTTATACCTAATGG |
| PRDM16 | Forward | ACTGAAGGAGGCCGACTTTG |
|  | Reverse | CGGAATGTGGGGTCCTCATC |
| CPT1 | Forward | TCGGTGAGCCTGGCCT |
|  | Reverse | TTGAGTGGTGACCGAGTCTG |
| AdipoQ | Forward | CCAATGTACCCATTCGCTTTAC |
|  | Reverse | GAAGTAGTAGAGTCCCGGAATG |
| FABP4 | Forward | CATCCGGTCAGAGAGTACTTTT |
|  | Reverse | TAGGGTTATGATGCTCTTCACC |
| CEBPα | Forward | AAGCCAAACAACGCAACGTG |
|  | Reverse | ACCAAGGAGCTCTCAGGCAG |
| GAPDH | Forward | TTGCCCTCAACGACCACTTT |
|  | Reverse | TGGTCCAGGGGTCTTACTCC |
| IRX1 | Forward | AGTATGAACTGAAGGACAACCC |
|  | Reverse: | ACCATAGGGATAATAAGCAGGC |
| β-ACTIN | Forward: | AGGTGTGCACCTTTTATTGGTCTCAA |
|  | Reverse: | TCCCTCTGGTTTGGAAGTATGT |

Figure S1.


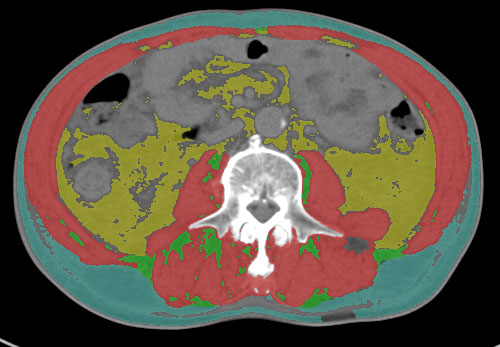


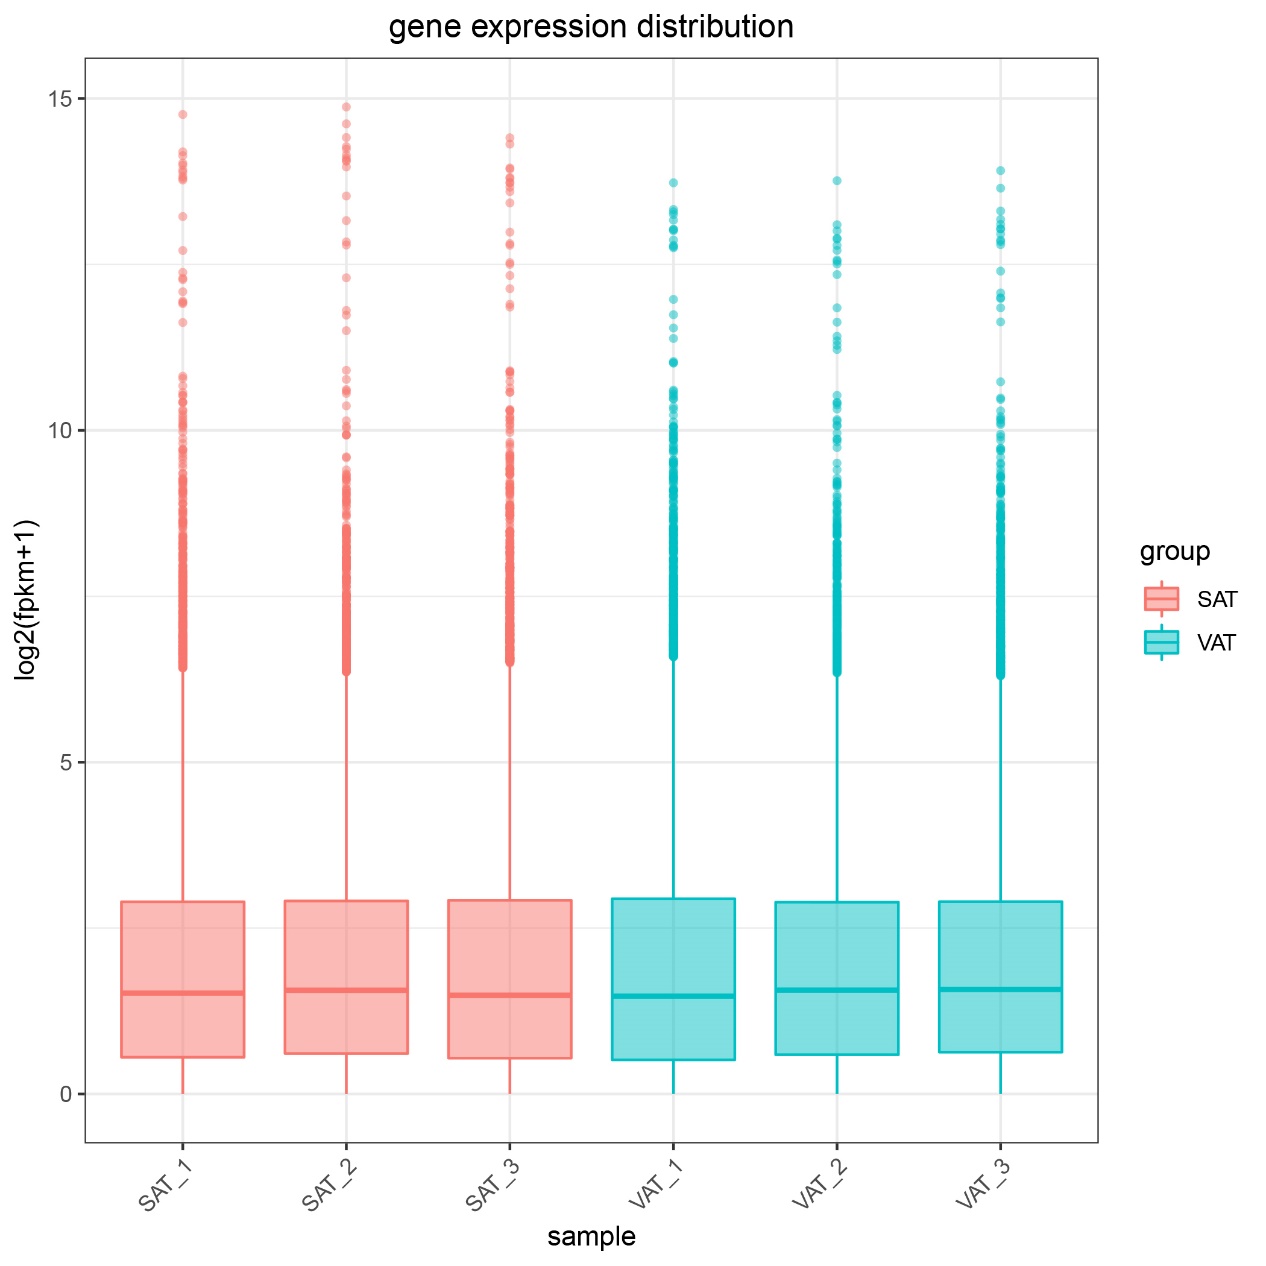
Figure S2.
