# Supplementary figures and images for: IRX1 Promotes Loss of Subcutaneous Adipose Tissue by Inhibiting Adipocyte Differentiation in Cachectic Patients with Gastric Cancer
Source: Research Square preprint supplement (doi:10.21203/rs.3.rs-1344846/v1), 2022-02-16

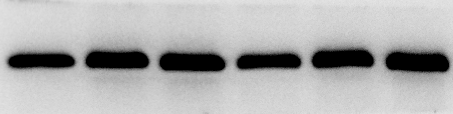

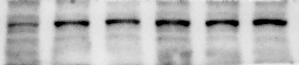


Original gel image in Figure 5


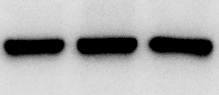

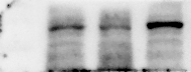

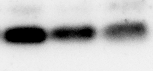

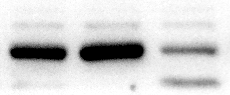

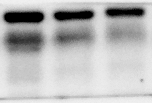

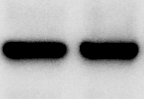

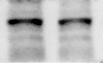

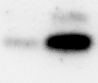

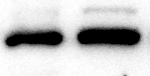

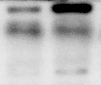


Original gel image in Figure 6

Supplement: Supplementary file 2 [file e66b684711aa0ea5a9b88e3d.docx]
